# Supplementary material
Source: HighWire-hosted journal article supplement (https://tobaccocontrol.bmj.com/content/32/5/627)
Supplement: inline-supplementary-material-1 [file inline-supplementary-material-1.pdf]

# Supplemental information

## Flavors and flavorings in waterpipe products: a comparison between tobacco, herbal molasses and steam stones

Ingrid M.E. Bakker-‘t Hart, Frank Bakker, Jeroen L.A. Pennings, Naömi Weibolt, Selma Eising, Reinskje Talhout

249 waterpipe tobacco products were registered in EU-CEG in The Netherlands in March 2019. These products contain a total of 378 unique ingredients. The 25 most frequently added ingredients of waterpipe tobacco, as registered in the EU-CEG database, are listed below (Table S1).

**Table S1.** The 25 most frequently added ingredients in EU-CEG registered waterpipe tobacco products (March 2019, The Netherlands). Shown in this table are ingredient names, prevalence, median concentration per product (mg/g) flavor descriptions (from the Leffingwell database) and additive functions. N/A = not applicable.

| Ingredient name          | Prevalence | Median conc. (mg/g) | Flavor description                                         | Function                          |
|--------------------------|------------|---------------------|------------------------------------------------------------|-----------------------------------|
| Glycerol                 | 100%       | 434                 | N/A                                                        | Solvent, humectant, bodying agent |
| Propylene glycol         | 62%        | 17.0                | N/A                                                        | Solvent, humectant, bodying agent |
| Water                    | 63%        | 1.27                | N/A                                                        | Solvent, humectant                |
| Vanillin                 | 59%        | 0.31                | Sweet, powerful, creamy, vanilla-like                      | Flavoring                         |
| Ethyl alcohol            | 49%        | 0.01                | N/A                                                        | Solvent                           |
| Ethyl vanillin           | 47%        | 0.02                | Intense, sweet, vanilla-like odor; creamy, vanilla taste   | Flavoring                         |
| High fructose corn syrup | 44%        | 357                 | Sweet                                                      | Bodying agent, flavoring (sugar)  |
| Caramel                  | 44%        | 0.006               | Primarily used for coloring purposes; little taste as used | Flavoring (sugar), color          |
| Potassium sorbate        | 44%        | 0.003               | N/A                                                        | Preservative                      |

|                                                   |     |       |                                                                            |                              |
|---------------------------------------------------|-----|-------|----------------------------------------------------------------------------|------------------------------|
| Synthetic amorphous silica                        | 44% | 4.00  | N/A                                                                        | Anticaking agent             |
| FD&C red                                          | 43% | 0.25  | N/A                                                                        | Dye                          |
| Dihydrocoumarin                                   | 41% | 0.001 | Very, sweet, nut-like, hay-like, coumarin-tobacco like odor                | Flavoring                    |
| Ethyl butyrate                                    | 40% | 1.24  | Ethereal, fruity with buttery-pineapple-banana, ripe fruit and juicy notes | Flavoring                    |
| Ethyl acetate                                     | 34% | 0.49  | Ethereal, sharp, wine-brandy-like                                          | Flavoring                    |
| Unspecified flavors                               | 31% | 50.0  | N/A                                                                        | Mixture, various ingredients |
| Ethyl-2-methylbutyrate                            | 31% | 0.54  | Strong, green, fruity, apple with strawberry notes                         | Flavoring                    |
| Maltol                                            | 27% | 0.22  | Sweet, fruity, berry, strawberry, caramellic                               | Flavoring                    |
| Isoamyl acetate                                   | 25% | 1.10  | Sweet, fruity, banana, pear odor & taste                                   | Flavoring                    |
| Menthol                                           | 25% | 0.76  | String trigeminal cooling sensation with a slight mint note                | Flavoring                    |
| Benzyl alcohol                                    | 24% | 1.26  | Faint, sweet, almond fruity, somewhat chemical                             | Flavoring                    |
| Benzaldehyde                                      | 23% | 0.07  | Floral, hay-like odor; sweet anise-vanilla-fruity herbaceous               | Flavoring                    |
| Sucrose                                           | 23% | 280   | Sweet                                                                      | Flavoring (sugar)            |
| Citric acid                                       | 23% | 0.72  | N/A                                                                        | Preservative                 |
| Sodium benzoate                                   | 23% | 0.70  | N/A                                                                        | Preservative                 |
| 4-(4-Hydroxyphenyl)-2-Butanone (raspberry ketone) | 20% | 0.61  | Very sweet, fruity odor and taste reminiscent of raspberry                 | Flavoring                    |

Next, ingredients from EU-CEG were sorted from highest to lowest median concentration (mg/g). After exclusion of the following ingredients (non-flavorings and sugars): glycerol, high fructose corn syrup, glucose, molasses, sucrose, fructose, 1,2-propylene glycol, triethyl citrate, alpha-tocopherol, synthetic amorphous silica, sunflower oil, acetic acid, malt extract, carmoisine and water only flavorings (including mixtures such as oils and extracts) were left and a top 25 is depicted in Table S2.

**Table S2.** This table shows 25 flavorings sorted on their median concentrations (from high to low) for EU-CEG registered waterpipe tobacco products (March 2019, The Netherlands). Listed in this table are ingredient names, median concentration per product (mg/g), prevalence and flavor descriptions (from the Leffinwell database).

N/A = not applicable, <sup>a</sup> = not found in Leffingwell database, but flavor/taste descriptions obtained from thegoodscentscompany.com

| Ingredient name             | Median conc. (mg/g) | Prevalence | Flavor description                                                                                                      |
|-----------------------------|---------------------|------------|-------------------------------------------------------------------------------------------------------------------------|
| Unspecified flavors         | 50.0                | 30.9%      | N/A                                                                                                                     |
| Pineapple essence           | 20.0                | 0.8%       | Sweet pineapple                                                                                                         |
| Allyl cyclohexyl propionate | 19.6                | 0.8%       | Sweet-fruity pineapple-like odor and taste                                                                              |
| Dodecanal                   | 12.0                | 2.4%       | Sweet, clean floral waxy odor; somewhat fatty-citrus woody flavor                                                       |
| Terpineol                   | 12.0                | 2.4%       | Sweet, floral (lilac), lime odor; very sweet taste in dilution                                                          |
| Citronellal                 | 10.0                | 3.6%       | Fresh, green, citrus-lemon, woody; citronella oil-like                                                                  |
| Banana distillates          | 10.0                | 0.4%       | Taste: Estery banana character. Full ripe banana flavor.banana <sup>a</sup>                                             |
| Licorice                    | 10.0                | 0.4%       | Sweet, caramel, spicy, “root-like” odor; very sweet flavor                                                              |
| Orange oil                  | 8.2                 | 16.5%      | Fresh, sweet, terpeny citrus                                                                                            |
| Triacetin                   | 3.8                 | 16.9%      | Very weak ethereal-fruity odor; a mild sweet taste; normal use as solvent                                               |
| Turpentine oil              | 3.4                 | 1.6%       | Peculiar, pine solvent, warm-balsamic, refreshing odor                                                                  |
| Hexyl acetate               | 2.8                 | 0.4%       | Sweet, fruity, pear-apple like odor; green, banana, apple-pear like taste                                               |
| Commint oil                 | 2.5                 | 11.2%      | Peppermint-like odor & flavor                                                                                           |
| Estragol                    | 2.5                 | 0.8%       | Odor: sweet sassafrass anise spicy green herbal fennel; flavor: sweet licorice phenolic weedy spicy celery <sup>a</sup> |
| Cis-3-hexenyl propionate    | 2.3                 | 0.8%       | Sweet green, waxy, vegetable character, apple, pear, citrus notes                                                       |
| Anethole                    | 2.2                 | 11.2%      | Sweet, herbaceous, anise (artificial Licorice) odor & taste                                                             |
| L-Carvone                   | 2.1                 | 5.2%       | Spearmint odor & taste                                                                                                  |
| Spearmint oil               | 1.9                 | 5.2%       | Warm characteristic spearmint herbaceous odor with a sharp taste                                                        |
| Mint oil                    | 1.8                 | 2.8%       | Odor: cornmint <sup>a</sup>                                                                                             |
| Cocoa extract               | 1.5                 | 0.8%       | Cocoa/chocolate aroma and flavor                                                                                        |
| Peppermint oil              | 1.5                 | 5.2%       | Sweet, fresh, peppermint (minty) aroma and cooling taste                                                                |
| Cinnamyl acetate            | 1.4                 | 0.4%       | Sweet, balsamic, floral-fruity odor; slightly cinnamic spicy                                                            |
| Amyl butyrate               | 1.4                 | 2.8%       | Strong, fruity, apple, banana, apricot, mixed fruit flavor                                                              |
| Methyl 2-methylbutyrate     | 1.3                 | 0.8%       | Fruity, sweet, apple, berry, ripe tropical notes                                                                        |
| Citral                      | 1.3                 | 15.3%      | Strong, lemon-like aroma and taste                                                                                      |
